# Supplementary material for: Impacts of meteorology and emission reductions on haze pollution during the lockdown in the North China Plain: Insights from six-year simulations
Source: Copernicus journal article supplement (doi:10.5194/egusphere-2024-2704), 2024-09-06
Supplement: Supplementary file 1 [file egusphere-2024-2704-supplement.pdf]

# SI for " Impacts of meteorology and emission reductions on haze pollution during the lockdown in the North China Plain: Insights from six-year simulations"

Lang Liu<sup>1,2</sup>, Xin Long<sup>3,\*</sup>, Yi Li<sup>1,2\*</sup>, Zengliang Zang<sup>1,2</sup>, Yan Han<sup>3</sup>, Zhier Bao<sup>3</sup>, Yang Chen<sup>3</sup>, Tian Feng<sup>4</sup>, Jinxin Yang<sup>5</sup>

<sup>1</sup>College of Meteorology and Oceanography, National University of Defense Technology, Changsha, 410073, China

<sup>2</sup>High Impact Weather Key Laboratory of CMA, Changsha, 410073, China

<sup>3</sup>Research Center for Atmospheric Environment, Chongqing Institute of Green and Intelligent Technology, Chinese Academy of Sciences, Chongqing 400714, China

<sup>4</sup> Department of Geography & Spatial Information Techniques, Ningbo University, Ningbo, China

<sup>5</sup>School of Geography and Remote Sensing, Guangzhou University, Guangzhou 510006, China

## **Contents of this file**

Figures S1 to S8

Tables S1

**Figure S1**

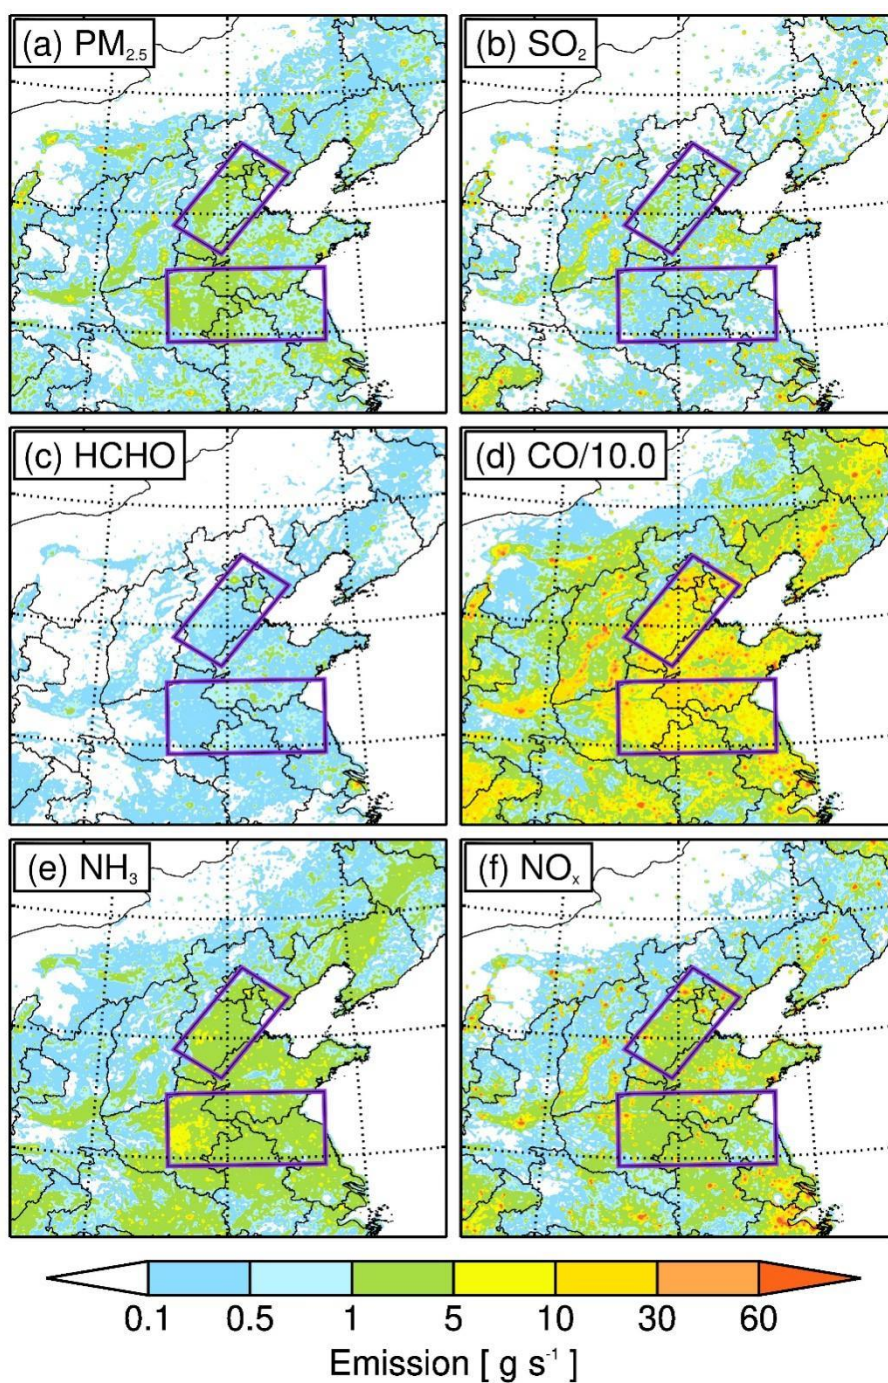

**Figure S1** Spatial distributions of pollutants in the research domain during the COVID-19 lockdown. (a)  $PM_{2.5}$ , (b)  $SO_2$ , (c) HCHO, (d) CO, (e)  $NH_3$ , and (f)  $NO_x$ .  $SO_2$ ,  $NO_x$ ,  $NH_3$  and HCHO (an effective indicator for VOCs) are gaseous precursors for secondary aerosols in  $PM_{2.5}$ . The regions of interest, NNCP (Northern North China Plain) and SNCP (Southern North China Plain), are highlighted.

**Figure S2**

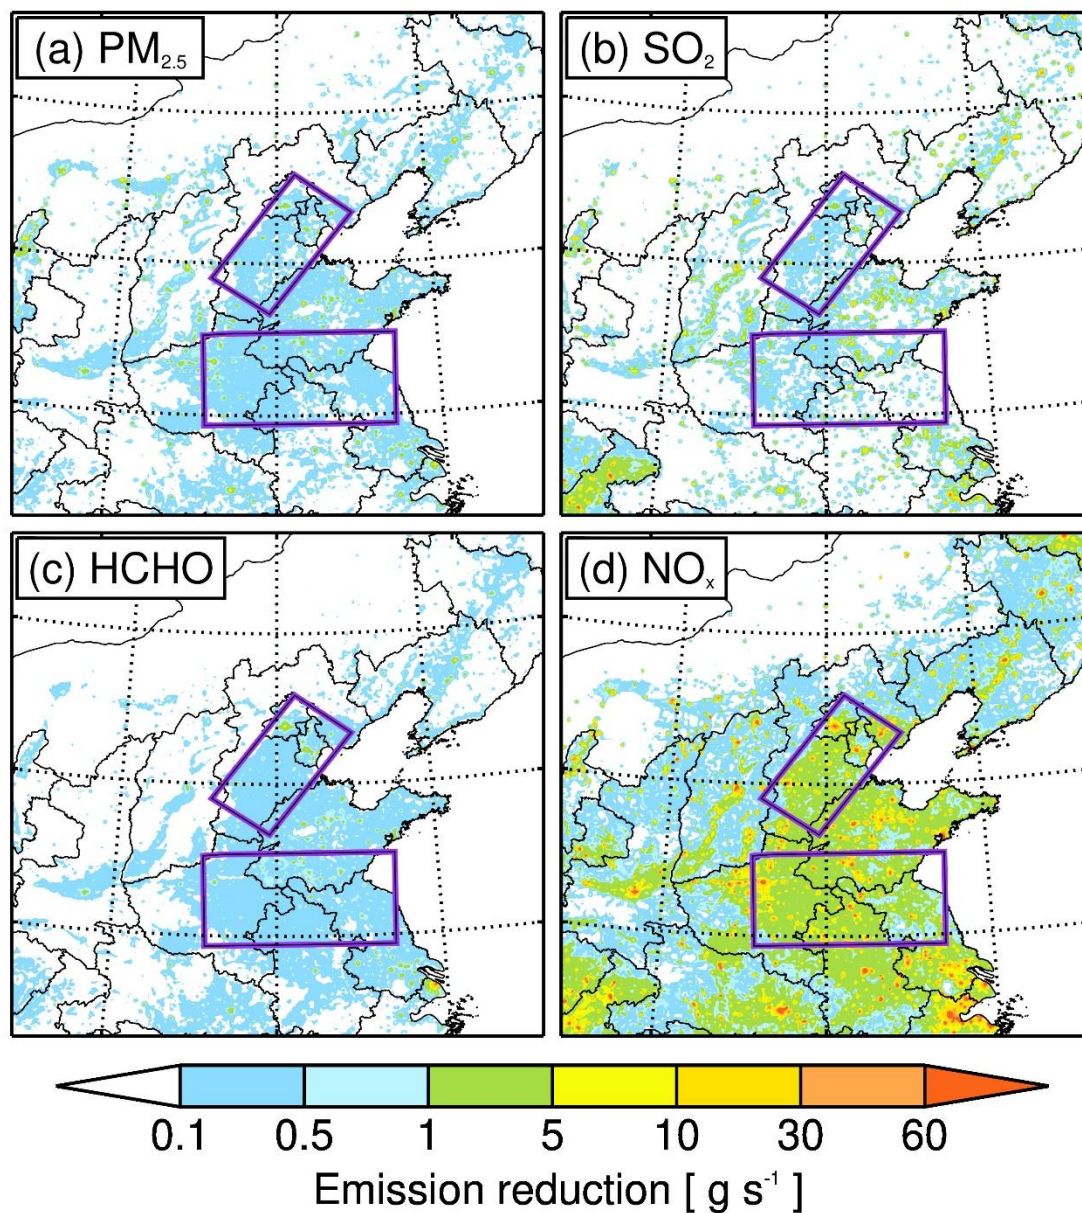

**Figure S2** Spatial distributions of emission reduction in the research domain during the COVID-19 lockdown. (a) PM<sub>2.5</sub>, (b) SO<sub>2</sub>, (c) HCHO, and (d) NO<sub>x</sub>. SO<sub>2</sub>, NO<sub>x</sub>, and HCHO (an effective indicator for VOCs) are gaseous precursors for secondary aerosols in PM<sub>2.5</sub>. The regions of interest, NNCP (Northern North China Plain) and SNCP (Southern North China Plain), are highlighted.



Figure S3

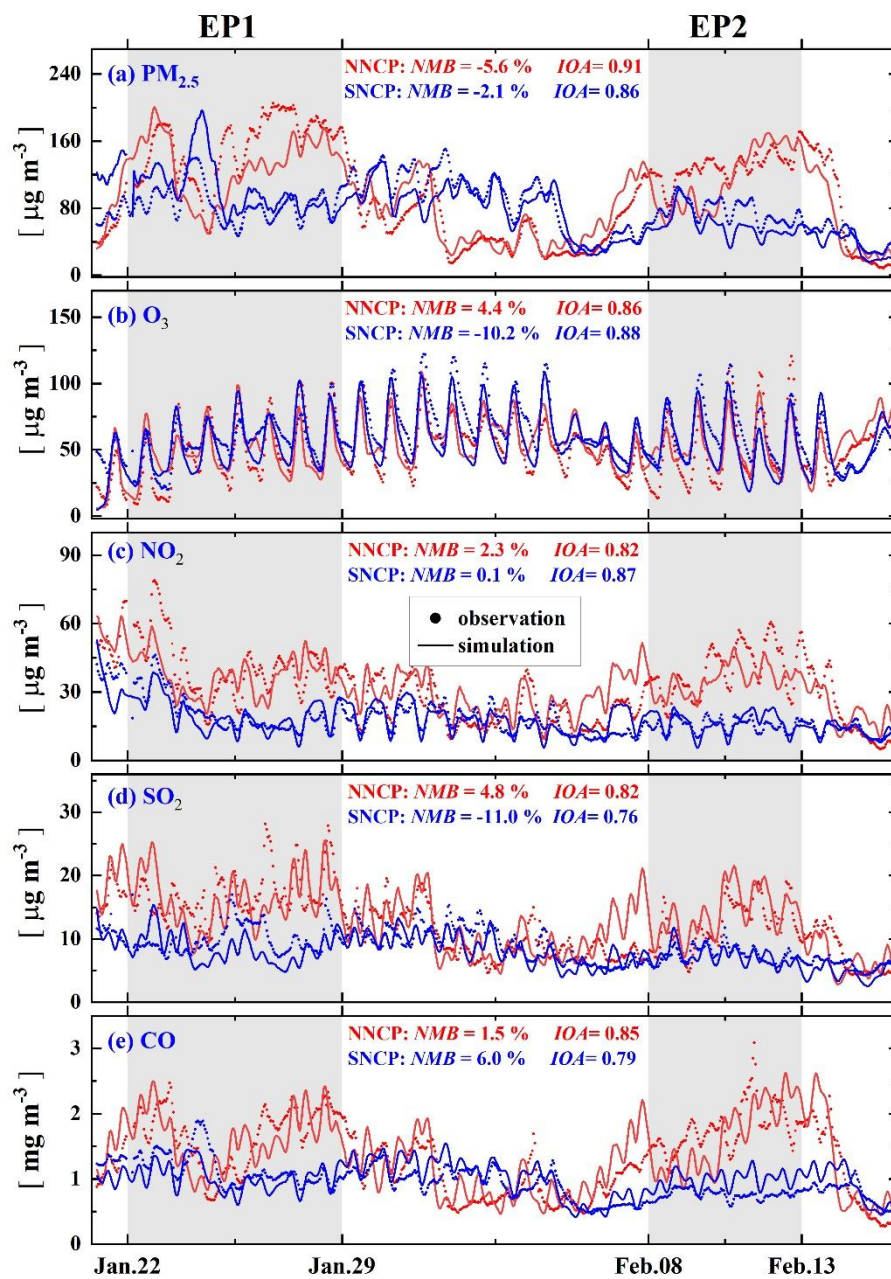

Figure S3. Comparisons of simulated and observed near-surface mass concentrations of (a)  $\text{PM}_{2.5}$ , (b)  $\text{O}_3$ , (c)  $\text{NO}_2$ , (d)  $\text{SO}_2$ , and (e) CO averaged across all ambient monitoring stations in the NNCP (red) and SNCP (blue) from 21 January to 16 February 2020. Solid lines represent simulated concentrations, while dots indicate observed concentrations.

Figure S4

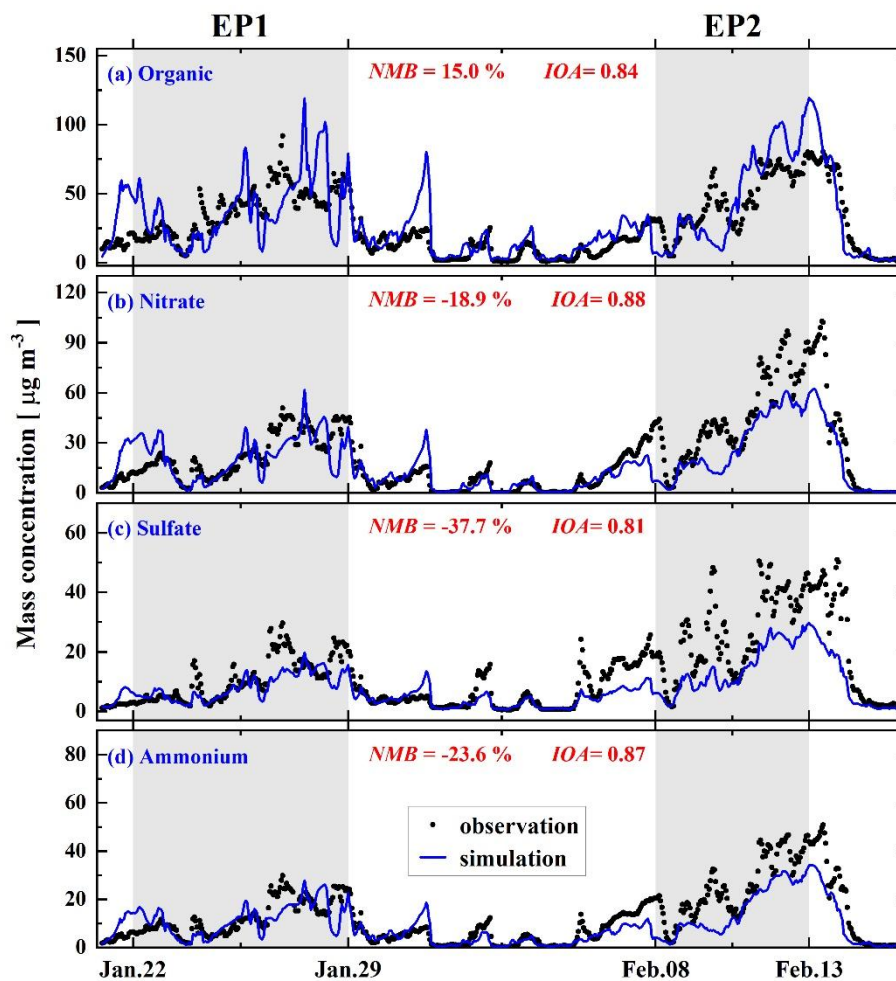

**Figure S4.** Comparisons of simulated and observed mass concentrations of (a) organic, (b) nitrate, (c) sulfate and (d) ammonium at the IAP monitoring site from 21 January to 16 February 2020. Blue lines represent simulated concentrations, while black dots indicate observed concentrations.

Figure S5

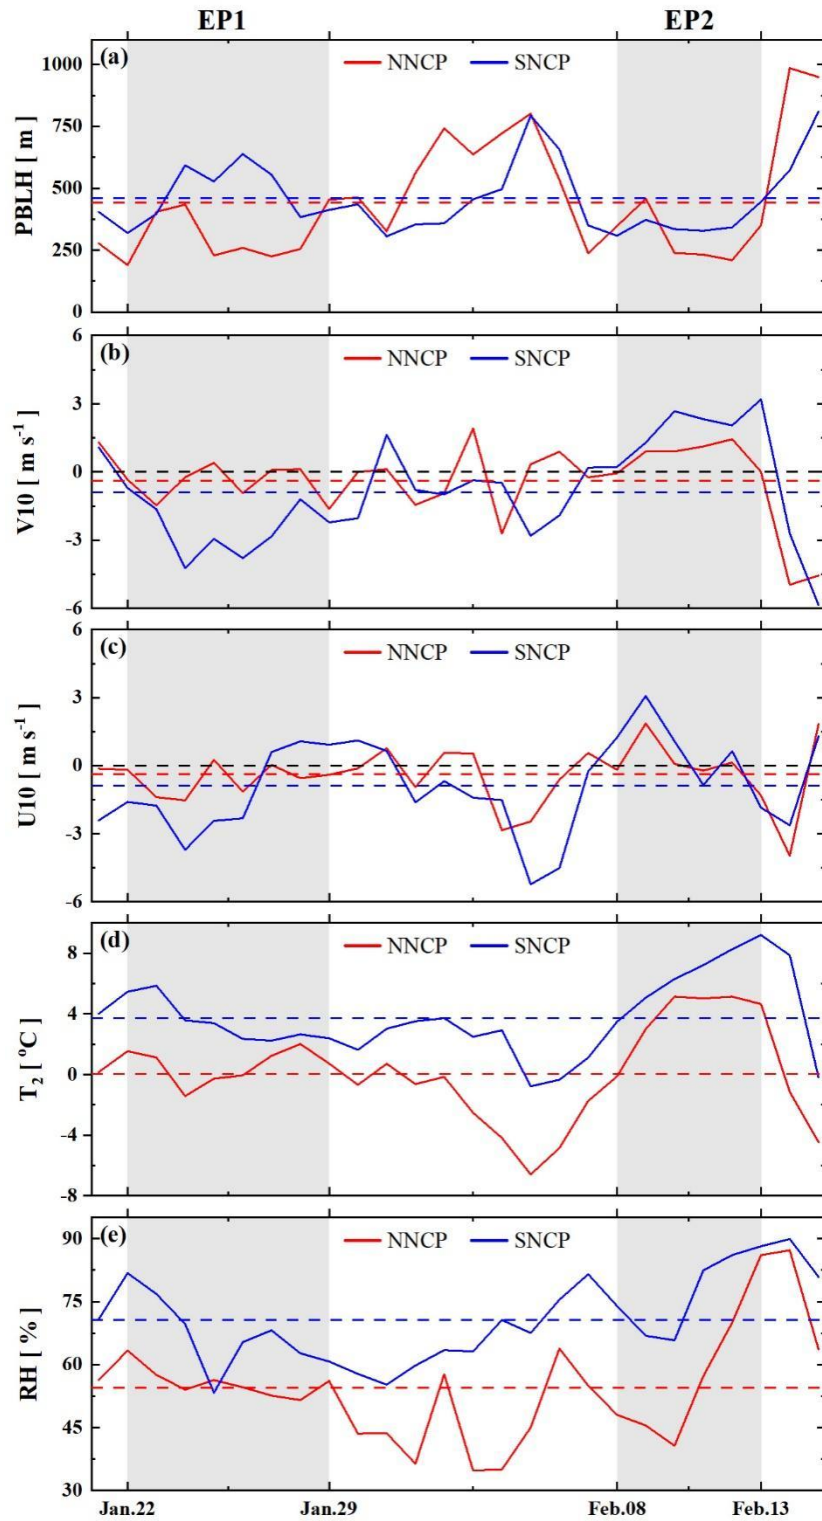

Figure S5. Regional day-to-day variations in (a) PBLH, (b) V10, (c) U10, (d) V10, and (e) RH in the NNCP and SNCP from 21 January to 16 February 2020.



**Figure S6**

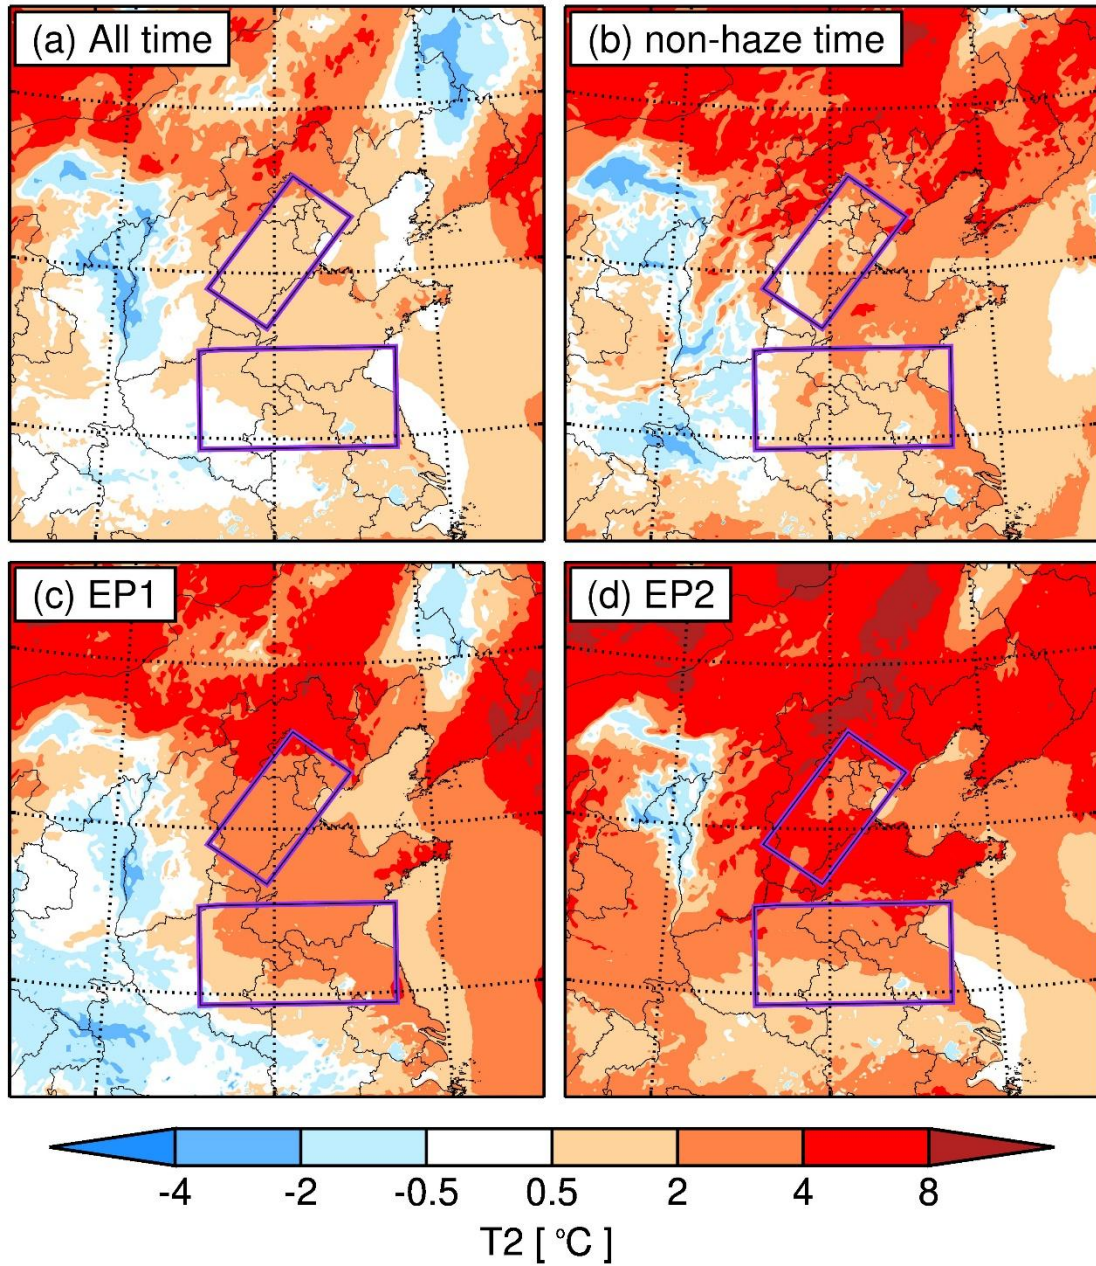

**Figure S6.** The pattern comparisons between the "BASE" and "SEN\_METEO" simulations. The color gradient represents near-surface temperature (T2) changes averaged from (a) the entire study period, (b) the non-haze period, (c) the EP1 haze period, and (d) the EP2 haze period.

Figure S7

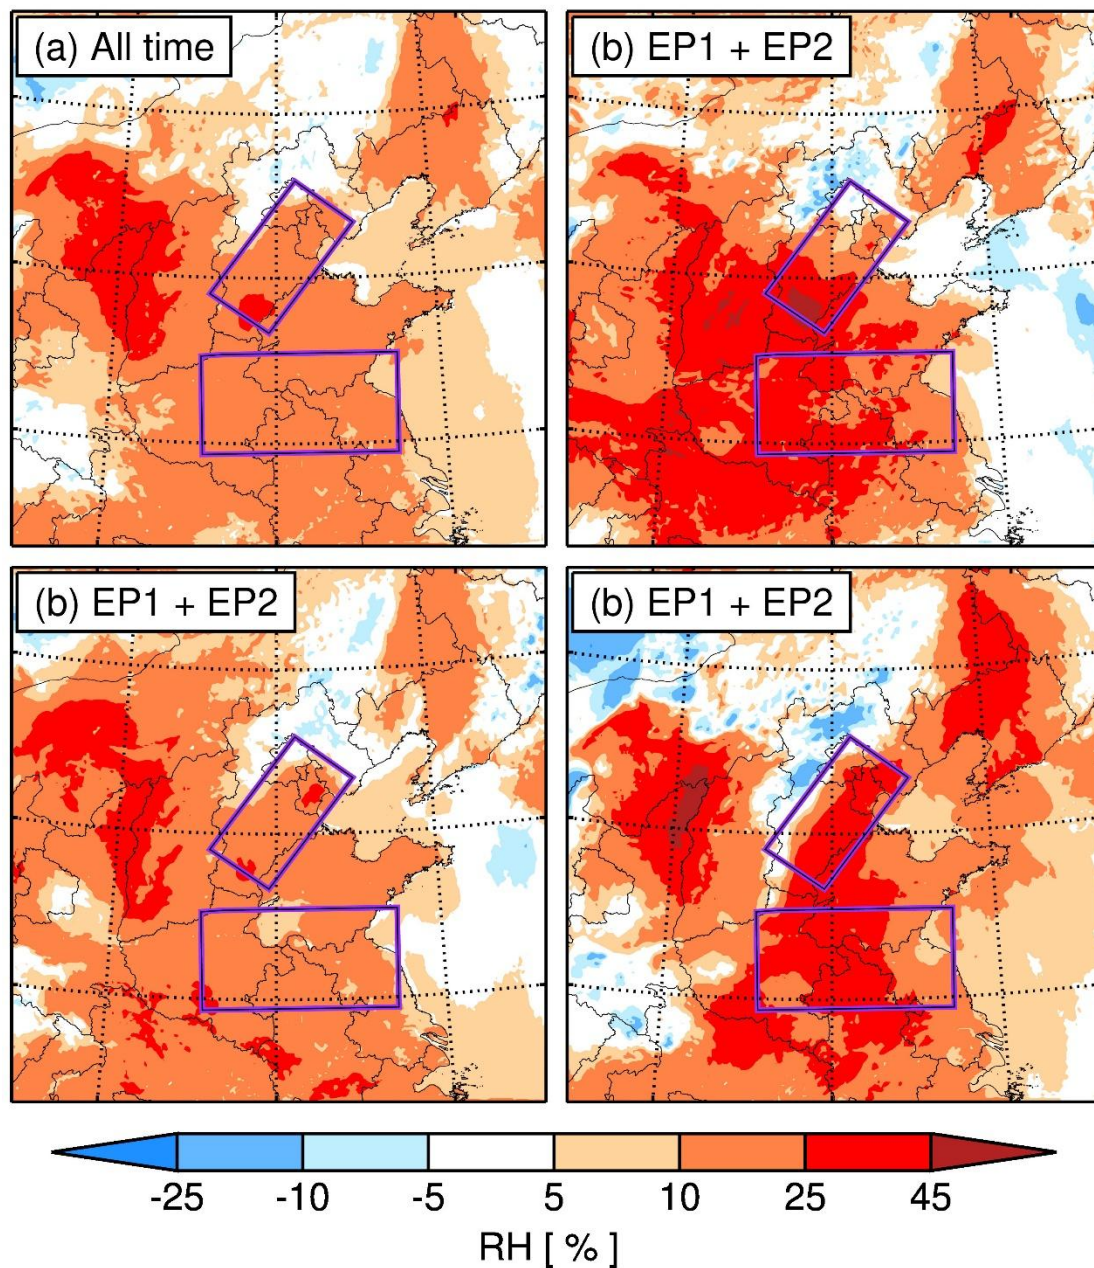

**Figure S7.** The pattern comparisons between the "BASE" and "SEN\_METEO" simulations. The color gradient represents relative humidity (RH) changes averaged from (a) the entire study period, (b) the non-haze period, (c) the EP1 haze period, and (d) the EP2 haze period.



Figure S8

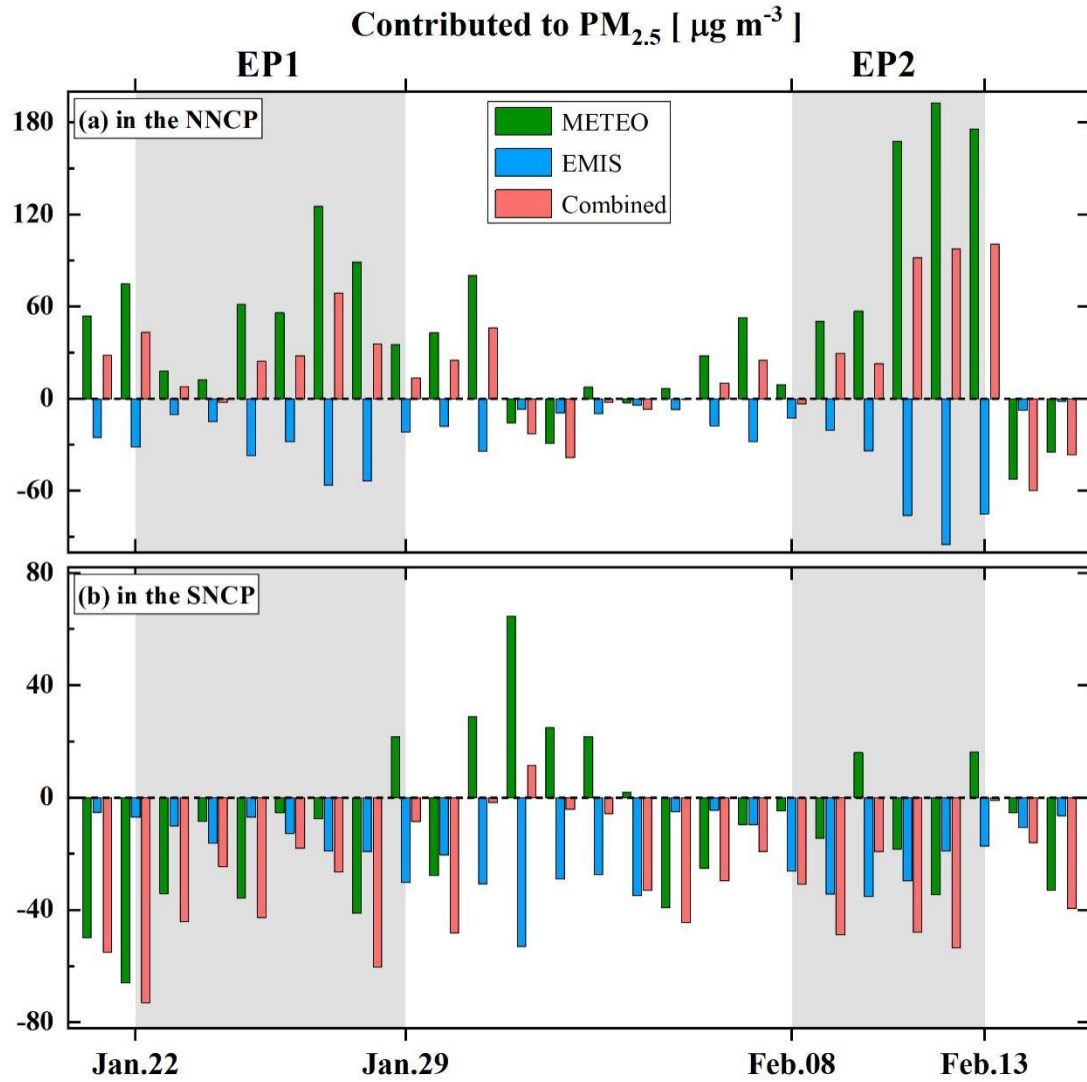

**Figure S8.** Regional contributions to daily PM<sub>2.5</sub> averaged in (a) the NNCP and (b) the SNCP. The contributions include meteorological conditions (METEO), abrupt decreases in anthropogenic emissions (EMIS), and combined effects of METEO and EMIS (Combined).

**Table S1****Table S1** Scale factors we used in the Emission 2020.

| <b>Province</b> \ <b>Species</b> | <b>CO</b> | <b>NO<sub>x</sub></b> | <b>SO<sub>2</sub></b> | <b>VOCs</b> | <b>PM<sub>2.5</sub></b> | <b>BC</b> | <b>OC</b> |
|----------------------------------|-----------|-----------------------|-----------------------|-------------|-------------------------|-----------|-----------|
| Beijing                          | 22%       | 45%                   | 26%                   | 45%         | 18%                     | 46%       | 8%        |
| Tianjin                          | 21%       | 38%                   | 20%                   | 41%         | 14%                     | 22%       | 6%        |
| Hebei                            | 15%       | 45%                   | 16%                   | 36%         | 12%                     | 17%       | 5%        |
| Anhui                            | 14%       | 56%                   | 22%                   | 31%         | 11%                     | 22%       | 4%        |
| Inner Mongolia                   | 14%       | 29%                   | 15%                   | 34%         | 13%                     | 16%       | 6%        |
| Shaanxi                          | 19%       | 45%                   | 18%                   | 34%         | 13%                     | 22%       | 5%        |
| Hubei                            | 19%       | 55%                   | 23%                   | 35%         | 16%                     | 23%       | 10%       |
| Jilin                            | 16%       | 39%                   | 23%                   | 34%         | 13%                     | 18%       | 5%        |
| Liaoning                         | 21%       | 40%                   | 28%                   | 36%         | 16%                     | 28%       | 8%        |
| Henan                            | 23%       | 57%                   | 22%                   | 41%         | 18%                     | 35%       | 8%        |
| Shandong                         | 23%       | 50%                   | 25%                   | 39%         | 19%                     | 35%       | 9%        |
| Jiangsu                          | 23%       | 50%                   | 26%                   | 41%         | 16%                     | 35%       | 7%        |
| Shanghai                         | 35%       | 48%                   | 42%                   | 45%         | 34%                     | 54%       | 42%       |
